# Supplementary material
Source: PubMed Central journal article supplement (PMC4098964)
Supplement: Supp_Fig1.pdf [file Supp_Fig1.pdf]

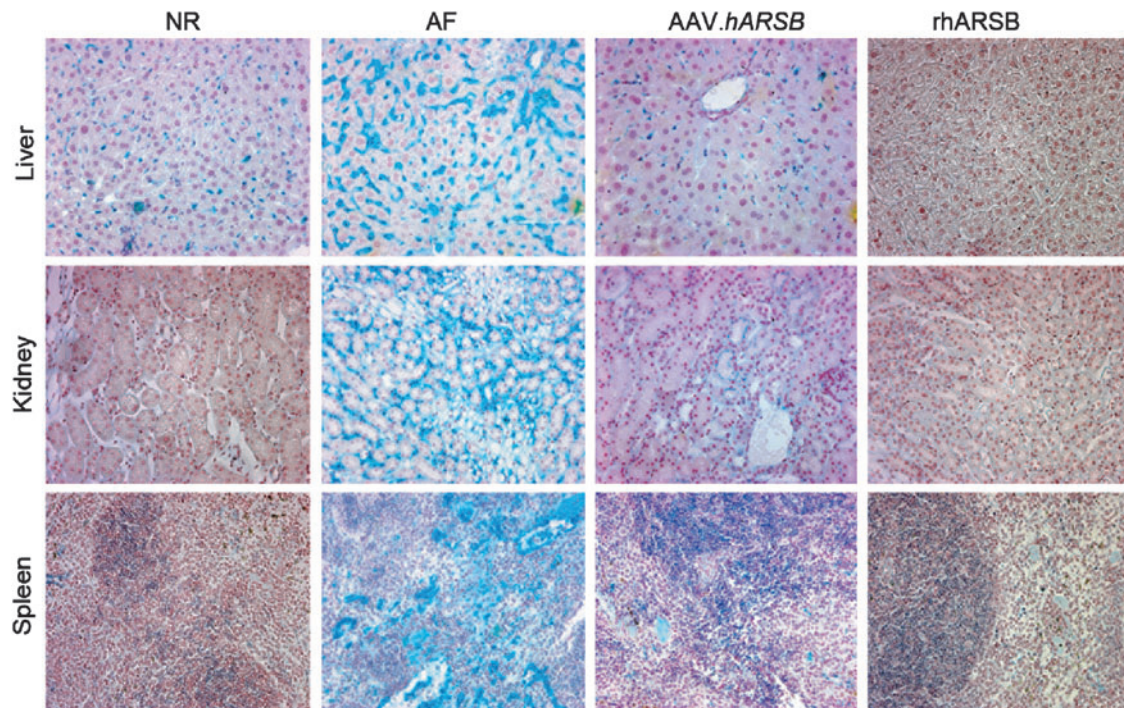

**SUPPLEMENTARY FIG. S1.** GAG reduction in liver, kidney, and spleen of MPS VI mice treated with either AAV-mediated gene therapy or rhARSB. Reduction of GAG storage was confirmed by Alcian blue staining of liver, kidney, and spleen histological sections obtained from MPS VI mice receiving AAV.TBG.*hARSB* (AAV.*hARSB*) or rhARSB and from NR and AF mice. Magnification 20 $\times$ . AAV, adeno-associated viral vector; AF, affected; ARSB, arylsulfatase B; GAG, glycosaminoglycan; MPS, mucopolysaccharidosis; NR, normal.
