# Supplementary material
Source: PubMed Central journal article supplement (PMC4098964)
Supplement: Supp_Table1.pdf [file Supp_Table1.pdf]

SUPPLEMENTARY TABLE S1. AAV2/8 BIODISTRIBUTION IN MICE AFTER EITHER RETRO-ORBITAL OR TAIL VEIN ADMINISTRATION

|               | <i>Liver (gc/mdg)</i> | <i>Kidney (gc/mdg)</i> | <i>Spleen (gc/mdg)</i> | <i>Brain (gc/mdg)</i> |
|---------------|-----------------------|------------------------|------------------------|-----------------------|
| Retro-orbital | 8.2±3.9               | 0.40±0.07              | 1.02±0.31              | 0.085±0.041           |
| Tail vein     | 7.2±2.2               | 0.63±0.34              | 0.33±0.17              | 0.022±0.020           |

AAV, adeno-associated viral vector; gc, genome copies; mdg, molecule of diploid genome.

AAV2/8 biodistribution was evaluated in adult C57/BL6-Tg*ARSBC91S* mice, which are wild-type C57/BL6 mice heterozygous for the *hARSB C91S* mutant coding sequence (Brooks *et al.*, 1995) at the ROSA 26 locus (Friedrich and Soriano, 1991; Ferla and Auricchio, unpublished results). C57/BL6-Tg*ARSBC91S* mice received  $2 \times 10^{12}$  gc/kg of AAV2/8-TBG-*eGFP* through either retro-orbital sinus ( $n=3$ ) or tail vein ( $n=3$ ) injection and were sacrificed 2 days postinjection. Results are reported as mean ± SE. Statistical comparisons were made using *t*-test. The exact *p*-values obtained are indicated in the Materials and Methods section. No statistically significant differences were observed.
